# Supplementary material
Source: Springer Nature journal article supplement (https://www.springermedizin.de/resource/supplementary/13069_2013_146_MOESM2_ESM.pdf/9659908)

**A.**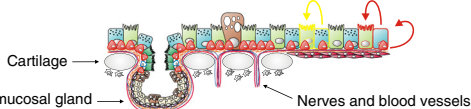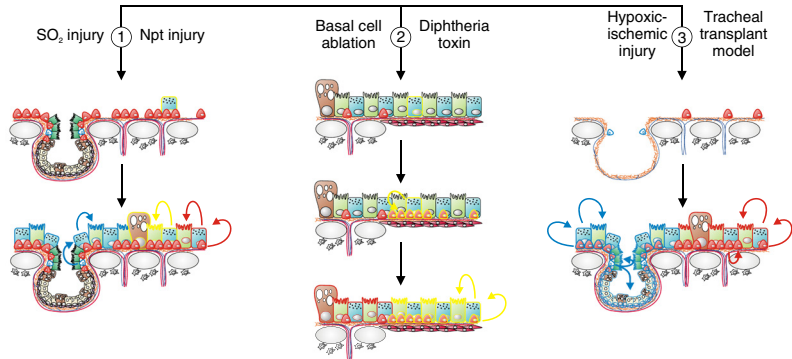**B.**

After SO<sub>2</sub>/Npt injury

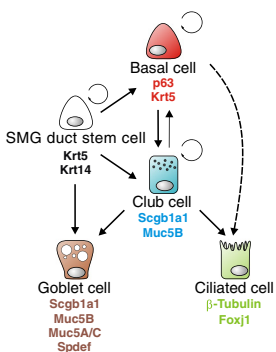

After diphtheria toxin-mediated basal cell ablation

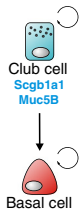

After hypoxic ischemic injury/  
Tracheal transplant model

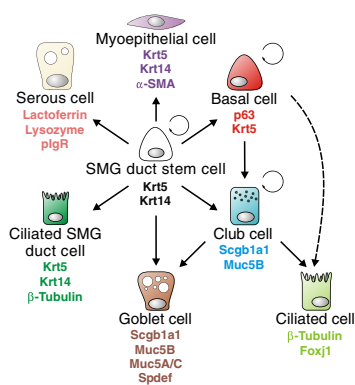

Supplement: MOESM2 [file 9659908]
